# Supplementary material for: Validation of an Automated System for the Extraction of a Wide Dataset for Clinical Studies Aimed at Improving the Early Diagnosis of Candidemia
Source: MDPI journal article supplement (doi:10.3390/diagnostics13050961), 2023-03-03
Supplement: s1 [file s1]

**Supplementary table S1. Manual validation of extraction accuracy\***

| Feature                                                                       | Number of correct extractions | Total extractions | Percentage of correct extractions |
|-------------------------------------------------------------------------------|-------------------------------|-------------------|-----------------------------------|
| Candidemia episode (yes/no)                                                   | 381                           | 381               | 100.00%                           |
| Bacteremia episode (yes/no)                                                   | 381                           | 381               | 100.00%                           |
| Correct origin of the episode                                                 | 381                           | 381               | 100.00%                           |
| Contamination (yes/no)**                                                      | 381                           | 381               | 100.00%                           |
| <i>Candida</i> colonization in the previous 30 days (yes/no)                  | 381                           | 381               | 100.00%                           |
| Bacterial colonization in the previous 30 days (yes/no)                       | 381                           | 381               | 100.00%                           |
| Multifocal <i>Candida</i> colonization (yes/no)                               | 381                           | 381               | 100.00%                           |
| Number of explored body sites for colonization                                | 380                           | 381               | 99.74%                            |
| Respiratory colonization by <i>Candida</i> spp. (yes/no)                      | 381                           | 381               | 100.00%                           |
| Respiratory colonization by bacteria (yes/no)                                 | 381                           | 381               | 100.00%                           |
| Genus and species of respiratory isolates                                     | 381                           | 381               | 100.00%                           |
| Urinary colonization by <i>Candida</i> spp. (yes/no)                          | 381                           | 381               | 100.00%                           |
| Urinary colonization by bacteria (yes/no)                                     | 381                           | 381               | 100.00%                           |
| Genus and species of urinary isolates                                         | 381                           | 381               | 100.00%                           |
| Gastrointestinal colonization by <i>Candida</i> spp. <del>only</del> (yes/no) | 381                           | 381               | 100.00%                           |
| Gastrointestinal colonization by bacteria (yes/no)                            | 381                           | 381               | 100.00%                           |
| Genus and species of gastrointestinal isolates                                | 381                           | 381               | 100.00%                           |
| Basophil cells count (day 0)                                                  | 381                           | 381               | 100.00%                           |
| Eosinophil cells count (day 0)                                                | 381                           | 381               | 100.00%                           |
| Lymphocyte cells count (day 0)                                                | 381                           | 381               | 100.00%                           |
| Monocyte cells count (day 0)                                                  | 381                           | 381               | 100.00%                           |
| Neutrophil cells count (day 0)                                                | 381                           | 381               | 100.00%                           |
| Hematocrit (day 0)                                                            | 381                           | 381               | 100.00%                           |
| Hemoglobin (day 0)                                                            | 381                           | 381               | 100.00%                           |
| White cells count (day 0)                                                     | 381                           | 381               | 100.00%                           |
| Red cells count (day 0)                                                       | 381                           | 381               | 100.00%                           |
| Platelet count (day 0)                                                        | 381                           | 381               | 100.00%                           |
| Activated partial thromboplastin time (day 0)                                 | 381                           | 381               | 100.00%                           |
| International normalized ratio (day 0)                                        | 381                           | 381               | 100.00%                           |
| Prothrombin time (day 0)                                                      | 381                           | 381               | 100.00%                           |
| Uric acid (day 0)                                                             | 381                           | 381               | 100.00%                           |
| Alkaline phosphatase (day 0)                                                  | 381                           | 381               | 100.00%                           |
| Alanine aminotransferase (day 0)                                              | 381                           | 381               | 100.00%                           |
| Aspartate aminotransferase (day 0)                                            | 381                           | 381               | 100.00%                           |
| Direct bilirubin (day 0)                                                      | 381                           | 381               | 100.00%                           |
| Total bilirubin (day 0)                                                       | 381                           | 381               | 100.00%                           |
| Creatinine (day 0)                                                            | 381                           | 381               | 100.00%                           |
| Gamma-glutamyl transferase (day 0)                                            | 381                           | 381               | 100.00%                           |
| Lactate dehydrogenase (day 0)                                                 | 381                           | 381               | 100.00%                           |
| Urea (day 0)                                                                  | 381                           | 381               | 100.00%                           |

|                                                |     |     |         |
|------------------------------------------------|-----|-----|---------|
| Glycated hemoglobin (day 0)                    | 381 | 381 | 100.00% |
| Glucose (day 0)                                | 381 | 381 | 100.00% |
| Albumin (day 0)                                | 381 | 381 | 100.00% |
| Beta-D-glucan (day 0)                          | 381 | 381 | 100.00% |
| C-reactive protein (day 0)                     | 381 | 381 | 100.00% |
| Procalcitonin (day 0)                          | 381 | 381 | 100.00% |
| Total proteins (day 0)                         | 381 | 381 | 100.00% |
| Lactate from arterial blood (day 0)            | 381 | 381 | 100.00% |
| Lactate from venous blood (day 0)              | 381 | 381 | 100.00% |
| Triglycerides (day 0)                          | 381 | 381 | 100.00% |
| Basophil cells count (day -1)                  | 381 | 381 | 100.00% |
| Eosinophil cells count (day -1)                | 381 | 381 | 100.00% |
| Lymphocyte cells count (day -1)                | 381 | 381 | 100.00% |
| Monocyte cells count (day -1)                  | 381 | 381 | 100.00% |
| Neutrophil cells count (day -1)                | 381 | 381 | 100.00% |
| Hematocrit (day -1)                            | 381 | 381 | 100.00% |
| Hemoglobin (day -1)                            | 381 | 381 | 100.00% |
| White cells count (day -1)                     | 381 | 381 | 100.00% |
| Red cells count (day -1)                       | 381 | 381 | 100.00% |
| Platelet count (day -1)                        | 381 | 381 | 100.00% |
| Activated partial thromboplastin time (day -1) | 381 | 381 | 100.00% |
| International normalized ratio (day -1)        | 381 | 381 | 100.00% |
| Prothrombin time (day -1)                      | 381 | 381 | 100.00% |
| Uric acid (day -1)                             | 381 | 381 | 100.00% |
| Alkaline phosphatase (day -1)                  | 381 | 381 | 100.00% |
| Alanine aminotransferase (day -1)              | 381 | 381 | 100.00% |
| Aspartate aminotransferase (day -1)            | 381 | 381 | 100.00% |
| Direct bilirubin (day -1)                      | 381 | 381 | 100.00% |
| Total bilirubin (day -1)                       | 381 | 381 | 100.00% |
| Creatinine (day -1)                            | 381 | 381 | 100.00% |
| Gamma-glutamyl transferase (day -1)            | 381 | 381 | 100.00% |
| Lactate dehydrogenase (day -1)                 | 381 | 381 | 100.00% |
| Urea (day -1)                                  | 381 | 381 | 100.00% |
| Glycated hemoglobin (day -1)                   | 381 | 381 | 100.00% |
| Glucose (day -1)                               | 381 | 381 | 100.00% |
| Albumin (day -1)                               | 381 | 381 | 100.00% |
| Beta-D-glucan (day -1)                         | 381 | 381 | 100.00% |
| C-reactive protein (day -1)                    | 381 | 381 | 100.00% |
| Procalcitonin (day -1)                         | 381 | 381 | 100.00% |
| Total proteins (day -1)                        | 381 | 381 | 100.00% |
| Lactate from arterial blood (day -1)           | 381 | 381 | 100.00% |
| Lactate from venous blood (day -1)             | 381 | 381 | 100.00% |
| Triglycerides (day -1)                         | 381 | 381 | 100.00% |
| Basophil cells count (day -2)                  | 381 | 381 | 100.00% |
| Eosinophil cells count (day -2)                | 381 | 381 | 100.00% |
| Lymphocyte cells count (day -2)                | 381 | 381 | 100.00% |

|                                                |     |     |         |
|------------------------------------------------|-----|-----|---------|
| Monocyte cells count (day -2)                  | 381 | 381 | 100.00% |
| Neutrophil cells count (day -2)                | 381 | 381 | 100.00% |
| Hematocrit (day -2)                            | 381 | 381 | 100.00% |
| Hemoglobin (day -2)                            | 381 | 381 | 100.00% |
| White cells count (day -2)                     | 381 | 381 | 100.00% |
| Red cells count (day -2)                       | 381 | 381 | 100.00% |
| Platelet count (day -2)                        | 381 | 381 | 100.00% |
| Activated partial thromboplastin time (day -2) | 381 | 381 | 100.00% |
| International normalized ratio (day -2)        | 381 | 381 | 100.00% |
| Prothrombin time (day -2)                      | 381 | 381 | 100.00% |
| Uric acid (day -2)                             | 381 | 381 | 100.00% |
| Alkaline phosphatase (day -2)                  | 381 | 381 | 100.00% |
| Alanine aminotransferase (day -2)              | 381 | 381 | 100.00% |
| Aspartate aminotransferase (day -2)            | 381 | 381 | 100.00% |
| Direct bilirubin (day -2)                      | 381 | 381 | 100.00% |
| Total bilirubin (day -2)                       | 381 | 381 | 100.00% |
| Creatinine (day -2)                            | 381 | 381 | 100.00% |
| Gamma-glutamyl transferase (day -2)            | 381 | 381 | 100.00% |
| Lactate dehydrogenase (day -2)                 | 381 | 381 | 100.00% |
| Urea (day -2)                                  | 381 | 381 | 100.00% |
| Glycated hemoglobin (day -2)                   | 381 | 381 | 100.00% |
| Glucose (day -2)                               | 381 | 381 | 100.00% |
| Albumin (day -2)                               | 381 | 381 | 100.00% |
| Beta-D-glucan (day -2)                         | 381 | 381 | 100.00% |
| C-reactive protein (day -2)                    | 381 | 381 | 100.00% |
| Procalcitonin (day -2)                         | 381 | 381 | 100.00% |
| Total proteins (day -2)                        | 381 | 381 | 100.00% |
| Lactate from arterial blood (day -2)           | 381 | 381 | 100.00% |
| Lactate from venous blood (day -2)             | 381 | 381 | 100.00% |
| Triglycerides (day -2)                         | 381 | 381 | 100.00% |
| Basophil cells count (day -3)                  | 381 | 381 | 100.00% |
| Eosinophil cells count (day -3)                | 381 | 381 | 100.00% |
| Lymphocyte cells count (day -3)                | 381 | 381 | 100.00% |
| Monocyte cells count (day -3)                  | 381 | 381 | 100.00% |
| Neutrophil cells count (day -3)                | 381 | 381 | 100.00% |
| Hematocrit (day -3)                            | 381 | 381 | 100.00% |
| Hemoglobin (day -3)                            | 381 | 381 | 100.00% |
| White cell count (day -3)                      | 381 | 381 | 100.00% |
| Red cell count (day -3)                        | 381 | 381 | 100.00% |
| Platelet count (day -3)                        | 381 | 381 | 100.00% |
| Activated partial thromboplastin time (day -3) | 381 | 381 | 100.00% |
| International normalized ratio (day -3)        | 381 | 381 | 100.00% |
| Prothrombin time (day -3)                      | 381 | 381 | 100.00% |
| Uric acid (day -3)                             | 381 | 381 | 100.00% |
| Alkaline phosphatase (day -3)                  | 381 | 381 | 100.00% |
| Alanine aminotransferase (day -3)              | 381 | 381 | 100.00% |

|                                                |     |     |         |
|------------------------------------------------|-----|-----|---------|
| Aspartate aminotransferase (day -3)            | 381 | 381 | 100.00% |
| Direct bilirubin (day -3)                      | 381 | 381 | 100.00% |
| Total bilirubin (day -3)                       | 381 | 381 | 100.00% |
| Creatinine (day -3)                            | 381 | 381 | 100.00% |
| Gamma-glutamyl transferase (day -3)            | 381 | 381 | 100.00% |
| Lactate dehydrogenase (day -3)                 | 381 | 381 | 100.00% |
| Urea (day -3)                                  | 381 | 381 | 100.00% |
| Glycated hemoglobin (day -3)                   | 381 | 381 | 100.00% |
| Glucose (day -3)                               | 381 | 381 | 100.00% |
| Albumin (day -3)                               | 381 | 381 | 100.00% |
| Beta-D-glucan (day -3)                         | 381 | 381 | 100.00% |
| C-reactive protein (day -3)                    | 381 | 381 | 100.00% |
| Procalcitonin (day -3)                         | 381 | 381 | 100.00% |
| Total proteins (day -3)                        | 381 | 381 | 100.00% |
| Lactate from arterial blood (day -3)           | 381 | 381 | 100.00% |
| Lactate from venous blood (day -3)             | 381 | 381 | 100.00% |
| Triglycerides (day -3)                         | 381 | 381 | 100.00% |
| Basophil cells count (day -4)                  | 381 | 381 | 100.00% |
| Eosinophil cells count (day -4)                | 381 | 381 | 100.00% |
| Lymphocyte cells count (day -4)                | 381 | 381 | 100.00% |
| Monocyte cells count (day -4)                  | 381 | 381 | 100.00% |
| Neutrophil cells count (day -4)                | 381 | 381 | 100.00% |
| Hematocrit (day -4)                            | 381 | 381 | 100.00% |
| Hemoglobin (day -4)                            | 381 | 381 | 100.00% |
| White cells count (day -4)                     | 381 | 381 | 100.00% |
| Red cells count (day -4)                       | 381 | 381 | 100.00% |
| Platelet count (day -4)                        | 381 | 381 | 100.00% |
| Activated partial thromboplastin time (day -4) | 381 | 381 | 100.00% |
| International normalized ratio (day -4)        | 381 | 381 | 100.00% |
| Prothrombin time (day -4)                      | 381 | 381 | 100.00% |
| Uric acid (day -4)                             | 381 | 381 | 100.00% |
| Alkaline phosphatase (day -4)                  | 381 | 381 | 100.00% |
| Alanine aminotransferase (day -4)              | 381 | 381 | 100.00% |
| Aspartate aminotransferase (day -4)            | 381 | 381 | 100.00% |
| Direct bilirubin (day -4)                      | 381 | 381 | 100.00% |
| Total bilirubin (day -4)                       | 381 | 381 | 100.00% |
| Creatinine (day -4)                            | 381 | 381 | 100.00% |
| Gamma-glutamyl transferase (day -4)            | 381 | 381 | 100.00% |
| Lactate dehydrogenase (day -4)                 | 381 | 381 | 100.00% |
| Urea (day -4)                                  | 381 | 381 | 100.00% |
| Glycated hemoglobin (day -4)                   | 381 | 381 | 100.00% |
| Glucose (day -4)                               | 381 | 381 | 100.00% |
| Albumin (day -4)                               | 381 | 381 | 100.00% |
| Beta-D-glucan (day -4)                         | 381 | 381 | 100.00% |
| C-reactive protein (day -4)                    | 381 | 381 | 100.00% |
| Procalcitonin (day -4)                         | 381 | 381 | 100.00% |

|                                                |     |     |         |
|------------------------------------------------|-----|-----|---------|
| Total proteins (day -4)                        | 381 | 381 | 100.00% |
| Lactate from arterial blood (day -4)           | 381 | 381 | 100.00% |
| Lactate from venous blood (day -4)             | 381 | 381 | 100.00% |
| Triglycerides (day -4)                         | 381 | 381 | 100.00% |
| Basophil cells count (day -5)                  | 381 | 381 | 100.00% |
| Eosinophil cells count (day -5)                | 381 | 381 | 100.00% |
| Lymphocyte cells count (day -5)                | 381 | 381 | 100.00% |
| Monocyte cells count (day -5)                  | 381 | 381 | 100.00% |
| Neutrophil cells count (day -5)                | 381 | 381 | 100.00% |
| Hematocrit (day -5)                            | 381 | 381 | 100.00% |
| Hemoglobin (day -5)                            | 381 | 381 | 100.00% |
| White cells count (day -5)                     | 381 | 381 | 100.00% |
| Red cells count (day -5)                       | 381 | 381 | 100.00% |
| Platelet count (day -5)                        | 381 | 381 | 100.00% |
| Activated partial thromboplastin time (day -5) | 381 | 381 | 100.00% |
| International normalized ratio (day -5)        | 381 | 381 | 100.00% |
| Prothrombin time (day -5)                      | 381 | 381 | 100.00% |
| Uric acid (day -5)                             | 381 | 381 | 100.00% |
| Alkaline phosphatase (day -5)                  | 381 | 381 | 100.00% |
| Alanine aminotransferase (day -5)              | 381 | 381 | 100.00% |
| Aspartate aminotransferase (day -5)            | 381 | 381 | 100.00% |
| Direct bilirubin (day -5)                      | 381 | 381 | 100.00% |
| Total bilirubin (day -5)                       | 381 | 381 | 100.00% |
| Creatinine (day -5)                            | 381 | 381 | 100.00% |
| Gamma-glutamyl transferase (day -5)            | 381 | 381 | 100.00% |
| Lactate dehydrogenase (day -5)                 | 381 | 381 | 100.00% |
| Urea (day -5)                                  | 381 | 381 | 100.00% |
| Glycated hemoglobin (day -5)                   | 381 | 381 | 100.00% |
| Glucose (day -5)                               | 381 | 381 | 100.00% |
| Albumin (day -5)                               | 381 | 381 | 100.00% |
| Beta-D-glucan (day -5)                         | 381 | 381 | 100.00% |
| C-reactive protein (day -5)                    | 381 | 381 | 100.00% |
| Procalcitonin (day -5)                         | 381 | 381 | 100.00% |
| Total proteins (day -5)                        | 381 | 381 | 100.00% |
| Lactate from arterial blood (day -5)           | 381 | 381 | 100.00% |
| Lactate from venous blood (day -5)             | 381 | 381 | 100.00% |
| Triglycerides (day -5)                         | 381 | 381 | 100.00% |
| Basophil cells count (day -6)                  | 381 | 381 | 100.00% |
| Eosinophil cells count (day -6)                | 381 | 381 | 100.00% |
| Lymphocyte cells count (day -6)                | 381 | 381 | 100.00% |
| Monocyte cells count (day -6)                  | 381 | 381 | 100.00% |
| Neutrophil cells count (day -6)                | 381 | 381 | 100.00% |
| Hematocrit (day -6)                            | 381 | 381 | 100.00% |
| Hemoglobin (day -6)                            | 381 | 381 | 100.00% |
| White cells count (day -6)                     | 381 | 381 | 100.00% |
| Red cells count (day -6)                       | 381 | 381 | 100.00% |

|                                                |     |     |         |
|------------------------------------------------|-----|-----|---------|
| Platelet count (day -6)                        | 381 | 381 | 100.00% |
| Activated partial thromboplastin time (day -6) | 381 | 381 | 100.00% |
| International normalized ratio (day -6)        | 381 | 381 | 100.00% |
| Prothrombin time (day -6)                      | 381 | 381 | 100.00% |
| Uric acid (day -6)                             | 381 | 381 | 100.00% |
| Alkaline phosphatase (day -6)                  | 381 | 381 | 100.00% |
| Alanine aminotransferase (day -6)              | 381 | 381 | 100.00% |
| Aspartate aminotransferase (day -6)            | 381 | 381 | 100.00% |
| Direct bilirubin (day -6)                      | 381 | 381 | 100.00% |
| Total bilirubin (day -6)                       | 381 | 381 | 100.00% |
| Creatinine (day -6)                            | 381 | 381 | 100.00% |
| Gamma-glutamyl transferase (day -6)            | 381 | 381 | 100.00% |
| Lactate dehydrogenase (day -6)                 | 381 | 381 | 100.00% |
| Urea (day -6)                                  | 381 | 381 | 100.00% |
| Glycated hemoglobin (day -6)                   | 381 | 381 | 100.00% |
| Glucose (day -6)                               | 381 | 381 | 100.00% |
| Albumin (day -6)                               | 381 | 381 | 100.00% |
| Beta-D-glucan (day -6)                         | 381 | 381 | 100.00% |
| C-reactive protein (day -6)                    | 381 | 381 | 100.00% |
| Procalcitonin (day -6)                         | 381 | 381 | 100.00% |
| Total proteins (day -6)                        | 381 | 381 | 100.00% |
| Lactate from arterial blood (day -6)           | 381 | 381 | 100.00% |
| Lactate from venous blood (day -6)             | 381 | 381 | 100.00% |
| Triglycerides (day -6)                         | 381 | 381 | 100.00% |
| Basophil cells count (day -7)                  | 381 | 381 | 100.00% |
| Eosinophil cells count (day -7)                | 381 | 381 | 100.00% |
| Lymphocyte cells count (day -7)                | 381 | 381 | 100.00% |
| Monocyte cells count (day -7)                  | 381 | 381 | 100.00% |
| Neutrophil cells count (day -7)                | 381 | 381 | 100.00% |
| Hematocrit (day -7)                            | 381 | 381 | 100.00% |
| Hemoglobin (day -7)                            | 381 | 381 | 100.00% |
| White cells count (day -7)                     | 381 | 381 | 100.00% |
| Red cells count (day -7)                       | 381 | 381 | 100.00% |
| Platelet count (day -7)                        | 381 | 381 | 100.00% |
| Activated partial thromboplastin time (day -7) | 381 | 381 | 100.00% |
| International normalized ratio (day -7)        | 381 | 381 | 100.00% |
| Prothrombin time (day -7)                      | 381 | 381 | 100.00% |
| Uric acid (day -7)                             | 381 | 381 | 100.00% |
| Alkaline phosphatase (day -7)                  | 381 | 381 | 100.00% |
| Alanine aminotransferase (day -7)              | 381 | 381 | 100.00% |
| Aspartate aminotransferase (day -7)            | 381 | 381 | 100.00% |
| Direct bilirubin (day -7)                      | 381 | 381 | 100.00% |
| Total bilirubin (day -7)                       | 381 | 381 | 100.00% |
| Creatinine (day -7)                            | 381 | 381 | 100.00% |
| Gamma-glutamyl transferase (day -7)            | 381 | 381 | 100.00% |
| Lactate dehydrogenase (day -7)                 | 381 | 381 | 100.00% |

|                                      |     |     |         |
|--------------------------------------|-----|-----|---------|
| Urea (day -7)                        | 381 | 381 | 100.00% |
| Glycated hemoglobin (day -7)         | 381 | 381 | 100.00% |
| Glucose (day -7)                     | 381 | 381 | 100.00% |
| Albumin (day -7)                     | 381 | 381 | 100.00% |
| Beta-D-glucan (day -7)               | 381 | 381 | 100.00% |
| C-reactive protein (day -7)          | 381 | 381 | 100.00% |
| Procalcitonin (day -7)               | 381 | 381 | 100.00% |
| Total proteins (day -7)              | 381 | 381 | 100.00% |
| Lactate from arterial blood (day -7) | 381 | 381 | 100.00% |
| Lactate from venous blood (day -7)   | 381 | 381 | 100.00% |
| Triglycerides (day -7)               | 381 | 381 | 100.00% |

\* When a test was not performed at a specific time period (e.g., day -1), the automated extraction of a missing value was considered as a correct extraction, since it correctly reflected the lack of information. Pseudonymous information on patient's age, gender, ward of stay, and genus and species of bacteria or *Candida* isolated from all positive blood cultures during the study period were already available in the laboratory information system (LIS). This information can be routinely provided by the laboratory to physicians. Then, the automated extraction system automatically identified the number, origin, and type of episodes among all positive blood cultures, and proceeded with the extraction of all the required variables for the different episodes and organized them in the target dataset.

\*\* Random extractions were performed also to validate the accuracy of the extraction system in distinguishing between contamination and true bacteremia episodes
